# Supplementary material for: Proton diffusion dynamics along a diol as a proton-conducting wire in a photo-amphiprotic model system
Source: Royal Society of Chemistry journal article supplement (doi:10.1039/c6cp06265b), 2016-01-01
Supplement: c6cp06265b1.pdf [file c6cp06265b1.pdf]

## Supplementary Information

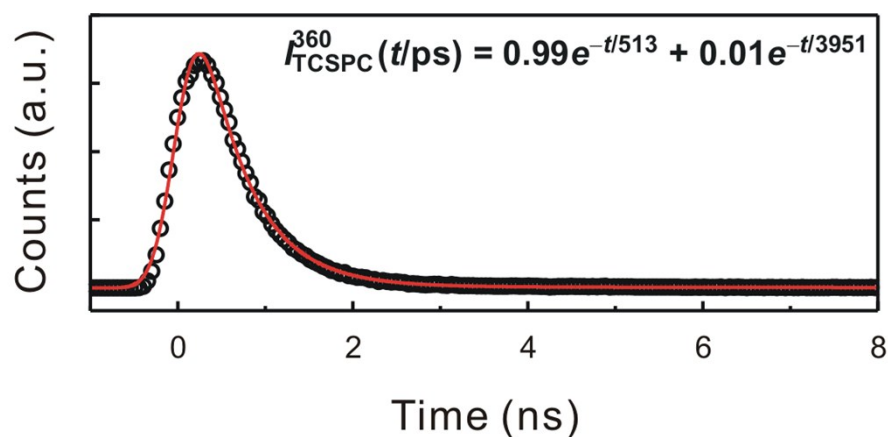

**Figure S1.** Fluorescence kinetic profiles of 7HQ ( $5 \times 10^{-4}$  M) in THF obtained at 360 nm when excited at 320 nm using TCSPC.

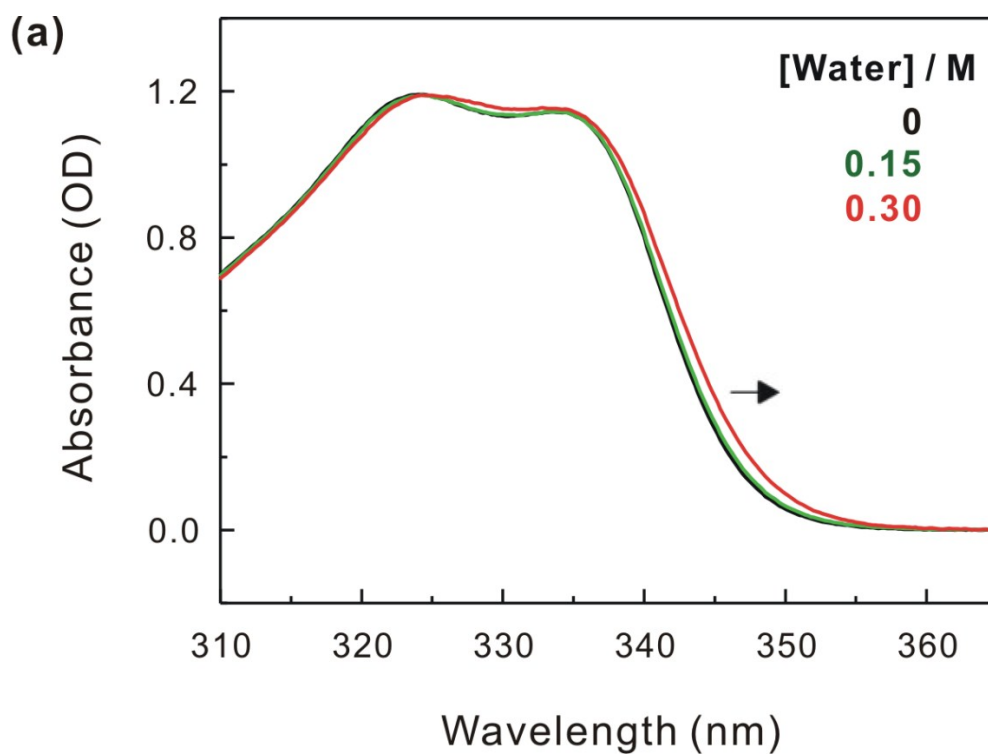

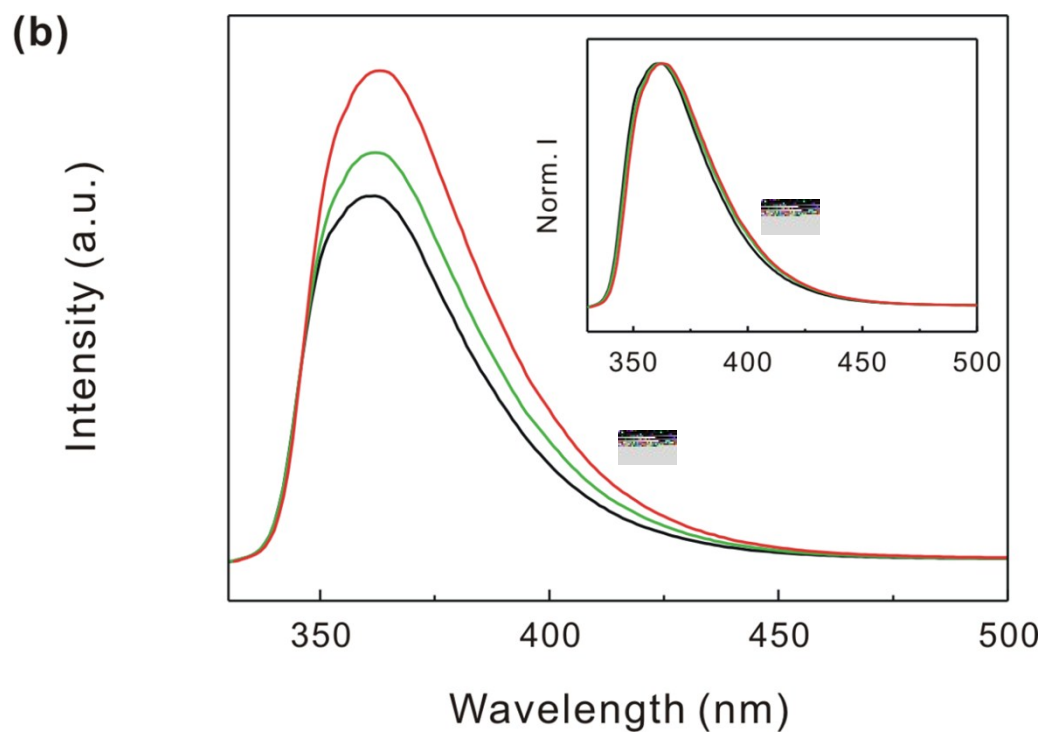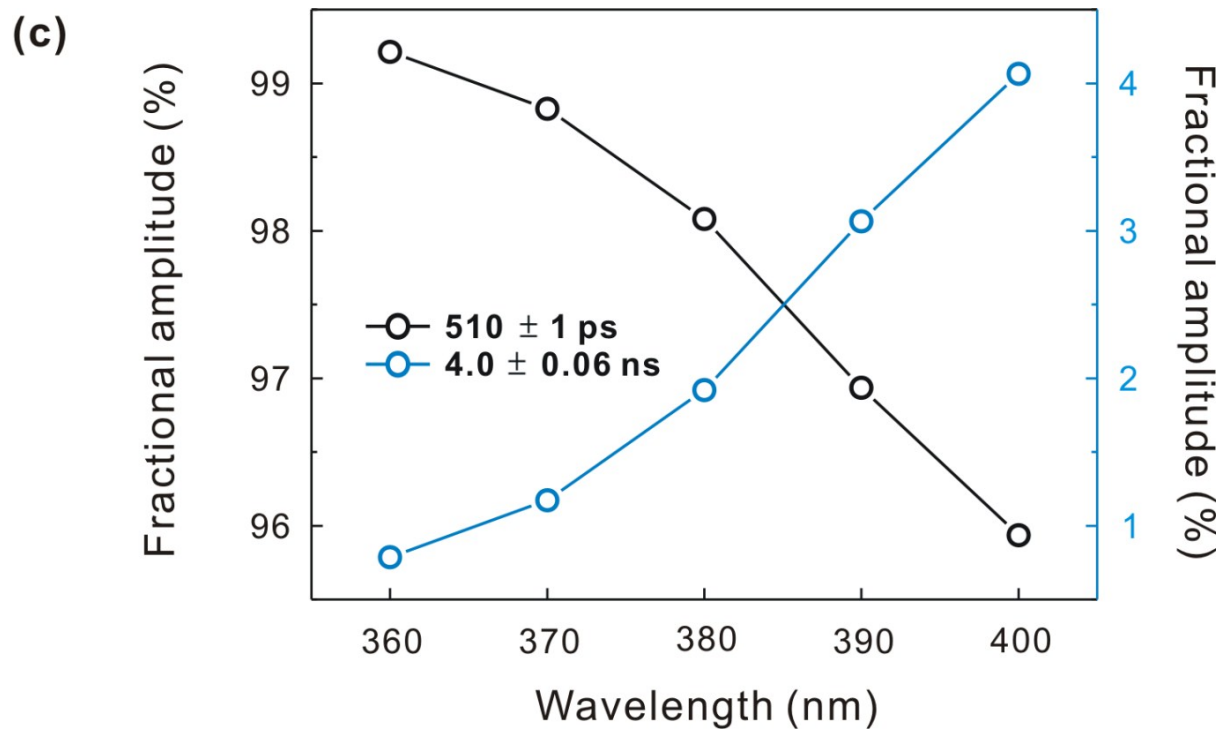

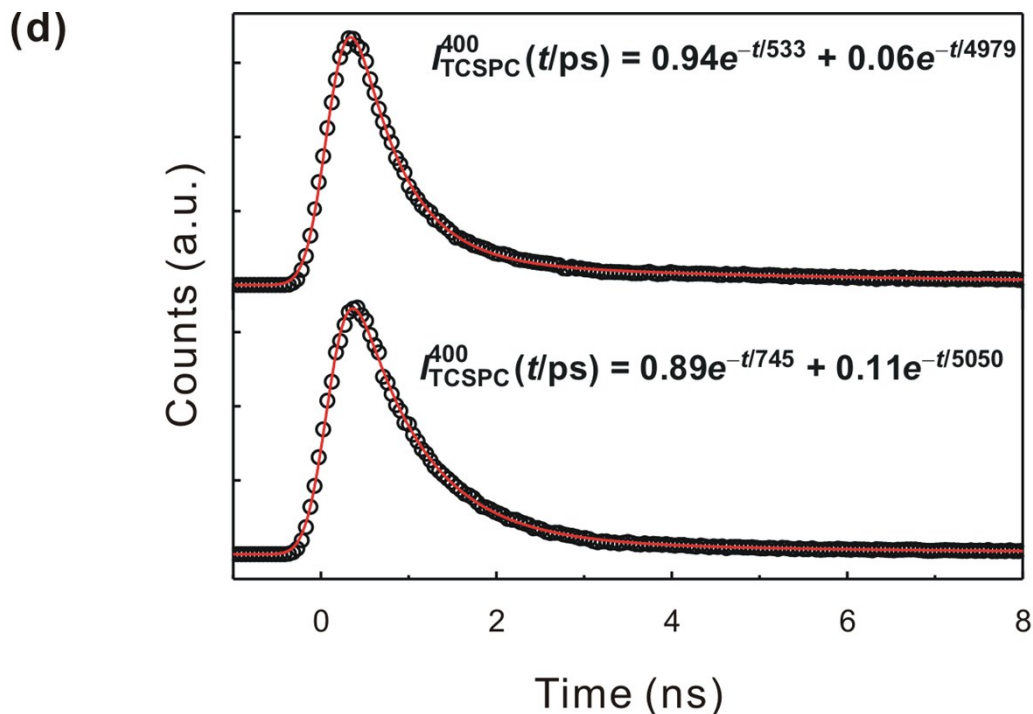

**Figure S2.** Steady-state spectra and time-resolved fluorescence decay profile: effects of water addition. The concentrations of 7HQ are  $10^{-4}$  M. (a) Absorption spectra of 7HQ in THF. (b) Emission spectra obtained with excitation at 320 nm. Inset: Normalised emission spectra. The concentrations of water are denoted in the figure. (c) Fractional amplitude distributions of two decay components of 7HQ ( $5 \times 10^{-4}$  M) in neat THF, 510 ps and 3.95 ns, monitored over 360-400 nm with excitation at 320 nm. (d) Time-resolved fluorescence kinetic profiles of 7HQ ( $5 \times 10^{-4}$  M) in neat THF (upper), and [added water] = 0.15 M (lower), monitored at 400 nm with excitation at 340 nm. Fits are given according to the equations in the panel.

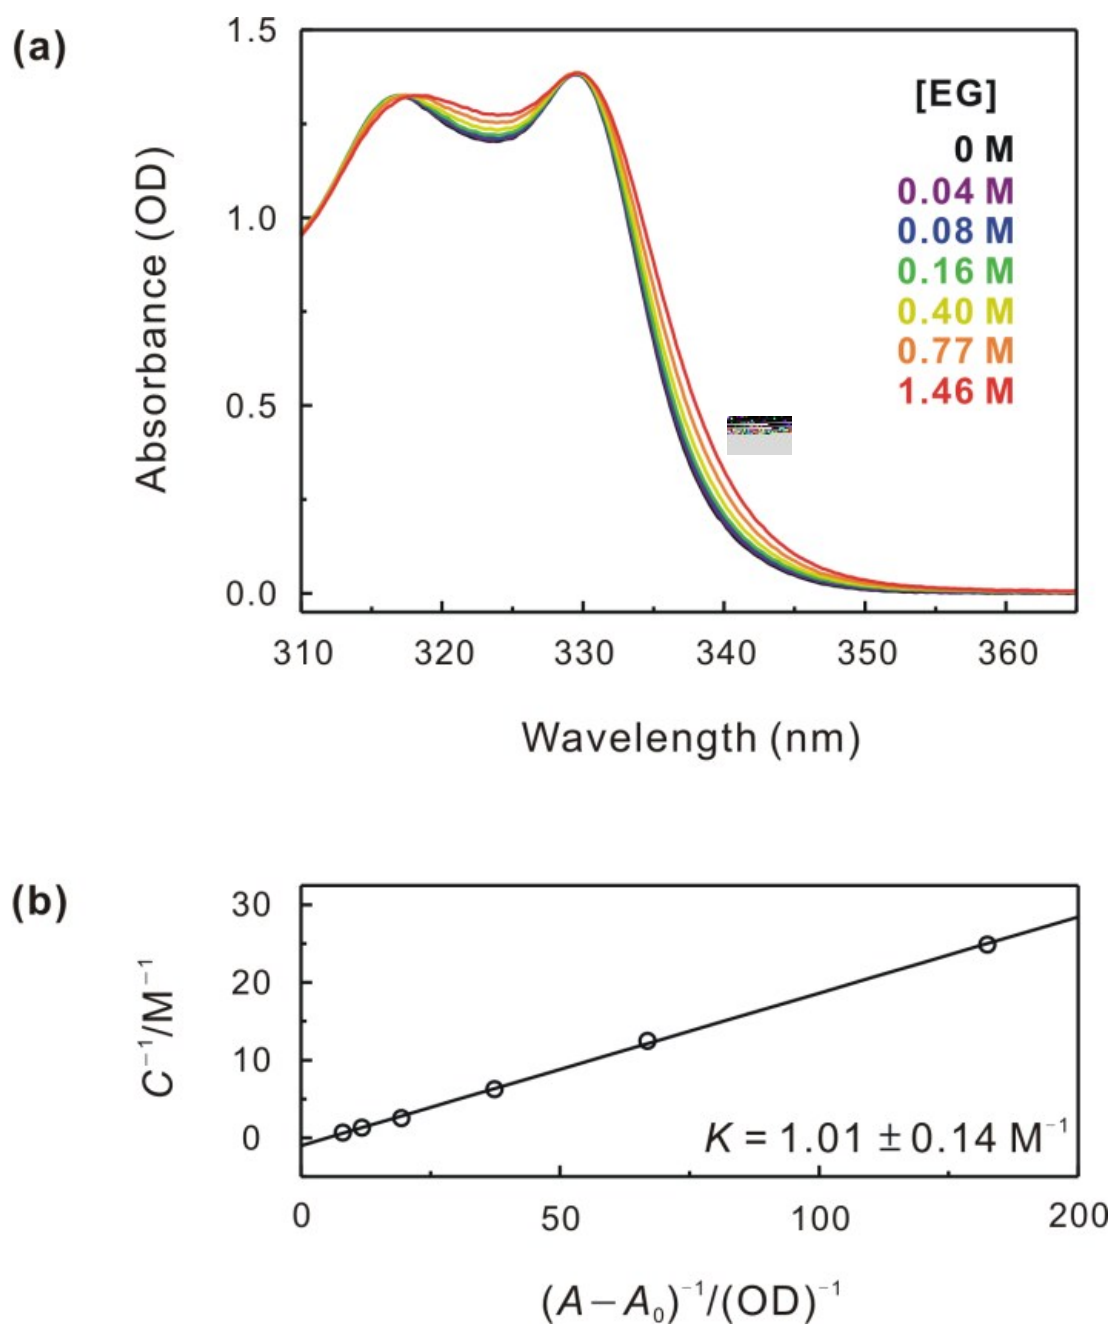

**Figure S3.** Steady-state spectra: effects of EG addition. (a) Absorption spectra of 7MQ ( $2 \times 10^{-4}$  M) in THF. The concentrations of EG are given in the figure. (b) Plot of reciprocals of molar EG concentration versus reciprocal absorbance,  $(A - A_0)^{-1}$ , at 345 nm.

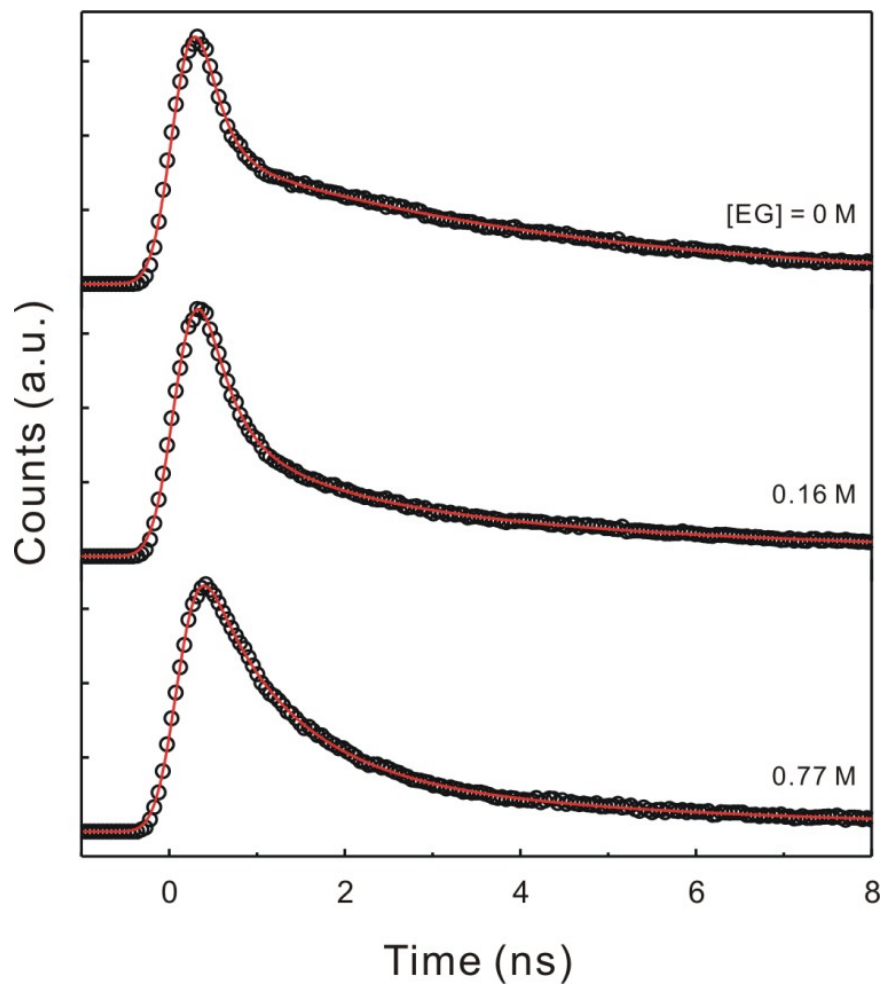

**Figure S4.** Time-resolved fluorescence: effects of H-bond complexation with EG. Fluorescence transients of 7MQ in THF ( $5 \times 10^{-4}$  M) collected at 400 nm with excitation at 320 nm. EG concentrations are given in the panel. Time evolution profiles are established as  $I_{\text{TCSPC}}^{400}(t/\text{ps}) = 0.98e^{-t/169} + 0.02e^{-t/4203}$ ,  $I_{\text{TCSPC}}^{400}(t/\text{ps}) = 0.59e^{-t/196} + 0.23e^{-t/659} + 0.18e^{-t/5253}$ , and  $I_{\text{TCSPC}}^{400}(t/\text{ps}) = 0.28e^{-t/278} + 0.59e^{-t/743} + 0.13e^{-t/5152}$  for [EG] = 0, 0.16 and 0.77 M, respectively.
